# Supplementary material
Source: PubMed Central journal article supplement (PMC212825)
Supplement: nar_31_17_e105__1.pdf [file nar_31_17_e105__1.pdf]

Table 1 supplement: Expression ratio of 18S and cyclophilin genes in the mesencephalon, thalamus, corpus striatum and limbic forebrain of rat after MK-801 or saline injection, ranks of distance of each ratio from the median ratio was calculated for groups with 1-3 outliers. <sup>s</sup>- Outlier of 18S, <sup>c</sup>- Outlier of cyclophilin, NO –No Outliers, or 4-5 outliers in this group. <sup>b</sup> Amount of MK is in mg drug per kg body weight.

| Brain part (# of group)               | 18S/cyc                            | Rank     |
|---------------------------------------|------------------------------------|----------|
| Mesencephalon Saline (1)              | 1.3                                | 3        |
|                                       | 0.6                                | 1        |
|                                       | 1.5                                | 4        |
|                                       | 0.6                                | 0        |
|                                       | <u>0.5<sup>c</sup></u>             | <u>2</u> |
| Thalamus Saline (2)                   | 1.4                                | 1        |
|                                       | 1.1                                | 3        |
|                                       | 1.4                                | 2        |
|                                       | <u>0.9<sup>c</sup></u>             | <u>4</u> |
|                                       | 1.4                                | 0        |
| Corpus striatum Saline (3)            | 1.2                                | NO       |
|                                       | 2.2                                | NO       |
|                                       | 2.9                                | NO       |
|                                       | 2.1                                | NO       |
|                                       | 1.4                                | NO       |
| Limbic forebrain Saline (4)           | 0.6                                | NO       |
|                                       | 0.6                                | NO       |
|                                       | 0.3                                | NO       |
|                                       | 0.4                                | NO       |
|                                       | 0.5                                | NO       |
| Mesencephalon MK 0.2 <sup>b</sup> (5) | 0.5                                | 1        |
|                                       | 0.2                                | 2        |
|                                       | 1.3                                | 3        |
|                                       | 0.7                                | 0        |
|                                       | <u><sup>s</sup>1.4<sup>c</sup></u> | <u>4</u> |
| Thalamus Saline MK 0.2 (6)            | 0.6                                | NO       |
|                                       | 0.3                                | NO       |
|                                       | 0.7                                | NO       |
|                                       | 0.7                                | NO       |
|                                       | 0.5                                | NO       |
| Corpus striatum MK 0.2 (7)            | <u>8.6<sup>c</sup></u>             | NO       |
|                                       | <u>12.7<sup>c</sup></u>            | NO       |
|                                       | 4.5                                | NO       |
|                                       | <u>1.7<sup>c</sup></u>             | NO       |
|                                       | <u>7.9<sup>c</sup></u>             | NO       |
| Limbic forebrain MK 0.2 (8)           | <u>3.1<sup>c</sup></u>             | NO       |
|                                       | <u><sup>s</sup>4.7<sup>c</sup></u> | NO       |
|                                       | <u>2.8<sup>c</sup></u>             | NO       |
|                                       | 1.3                                | NO       |

|                         | <u><sup>s</sup>3.2</u>  | NO       |
|-------------------------|-------------------------|----------|
|                         | 2.8                     | 4        |
| Mesencephalon           | 1.8                     | 0        |
| MK 0.7 <sup>b</sup> (9) | 2.1                     | 2        |
|                         | <u>1.2<sup>c</sup></u>  | <u>3</u> |
|                         | 1.7                     | 1        |
|                         | 5.1                     | 0        |
| Thalamus                | <u>12.2<sup>c</sup></u> | <u>4</u> |
| MK 0.7 (10)             | 4.7                     | 1        |
|                         | <u>1.6<sup>c</sup></u>  | <u>2</u> |
|                         | <u><sup>s</sup>10.7</u> | <u>3</u> |
|                         | 3                       | NO       |
| Corpus striatum         | 6.7                     | NO       |
| MK 0.7 (11)             | <u>3.2</u>              | NO       |
|                         | 2.5                     | NO       |
|                         | 2.6                     | NO       |
|                         | 1.7                     | NO       |
| Limbic forebrain        | <u>2.6<sup>c</sup></u>  | NO       |
| MK 0.7 (12)             | <u><sup>s</sup>1.9</u>  | NO       |
|                         | <u>2.4<sup>c</sup></u>  | NO       |
|                         | <u>2.2<sup>c</sup></u>  | NO       |
